# Supplementary material for: On the role of the south Pacific subtropical high at the onset of El Niño events
Source: Copernicus journal article supplement (doi:10.5194/acp-2018-82), 2018-05-02
Supplement: Supplementary file 1 [file acp-2018-82-supplement.pdf]

1  
2  
3  
4  
5  
6  
7  
8  
9  
10  
11  
12  
13  
14  
15  
16  
17  
18  
19  
20  
21  
22

Supplementary materials for

# On the role of the south Pacific subtropical high at the onset of El Niño events

## METHODS

**Wind Equator.** In contrast to the Trade winds in the Atlantic Ocean, the Trade Winds in the Pacific Ocean are symmetric about the  $\sim 5^{\circ}\text{N}$   $\sim 8^{\circ}\text{N}$  of latitude, rather than the geographic equator (**Extended Data Fig.1a-b**). This is confirmed by **Sailing Directions**<sup>26</sup> and **Routeing Chart 5127** (2012) published by UK Hydrographic Office (**Extended Data Fig.2**), suggesting that the NE Trade Winds may divert to NW or westerly once crossing the  $\sim 5^{\circ}\text{N}$   $\sim 8^{\circ}\text{N}$  of latitude. This can explain why the westerly winds can be seen in north of the equator in the western equatorial Pacific during El Nino events. The seasonal southward shifts of the Trade Winds are considered to be able to induce westerly winds during non-El Nino periods due to the elliptical shape of the SPSH but not sufficient to trigger El Nino events, rendering the occurrences of the westerly winds during non-El Nino periods more plausible.

The superposition of the NW or westerly winds onto a southward shift of the SPSH pushes the ECC eastward and southward to the geographic equator or more south, bringing the giant pool of the warm waters to the central and the eastern equatorial Pacific, thus leading to SSTs anomalies. The weakening of the SE Trade Winds due to southward migrations of the SPSH allows for a wide southward extension of the

23 westerly wind fetch (**Extended Data Fig.1b**). The magnitude of the westerly wind  
 24 fetch is determined by the meridional position of the SPSH.

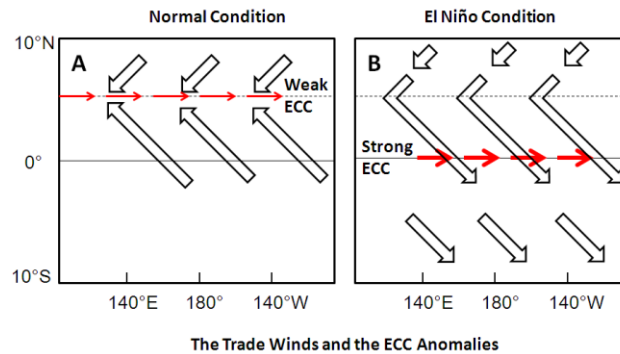

25  
 26 **Extended Data Fig 1. Schematic plots for the Trade Winds and the ECC anomalies.** **A**, The Trade  
 27 Winds and the ECC in normal condition. The Trade Winds are symmetric about  $\sim 5^{\circ}\text{N}$   $\sim 8^{\circ}\text{N}$  of latitude  
 28 (see Sailing Directions and Routeing Chart 5127 published by UK Hydrographic Office in 2012). The  
 29 climatologically mean axis of the ECC is at about  $\sim 5^{\circ}\text{N}$   $\sim 8^{\circ}\text{N}$  with weak intensity. **B**, The Trade  
 30 Winds and the ECC in El Niño condition. The Trade Winds change the direction from NE to NW after  
 31 crossing the wind equator (about  $\sim 5^{\circ}\text{N}$   $\sim 8^{\circ}\text{N}$ ). The mean axis of the ECC is at about  $\sim 0^{\circ}$  with strong  
 32 intensity. The hollow arrows and solid red arrows represent the Trade Winds and the ECC,  
 33 respectively.

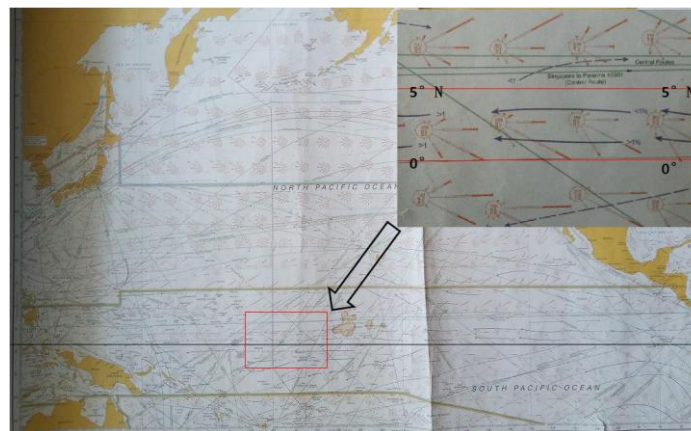

34  
 35 **Extended Data Fig 2. Routeing Chart 5127 (July) published by UK Hydrographic Office in 2012.**  
 36 The wind roses in pink color indicate the direction, intensity and frequency of the Winds. The intensity  
 37 of the winds from any direction is given by the thickness of the staff while the frequency is given by  
 38 the length of the staff. The inset map is a large scale of the square in red color, showing a frequency of  
 39  $\sim 40\%$ - $50\%$  SE Trade Winds ( $\sim 45\%$  Easterly) in July between  $\sim 0^{\circ}\text{N}$   $\sim 5^{\circ}\text{N}$  in the middle of the Pacific.  
 40 More details in text can be found in **Sailing Directions**.

41

42 **Coupled Model.** The model adopted in this study is a slightly modified version of  
 43 Lengaigne et al. (2006), with an intermediate complex climate GCM, HadOPA,

44 coupling the OPA ocean model and the HadAM3 atmospheric model through OASIS  
45 2.4. The OPA model consists of the global configuration ORCA (Madec et al., 1998)  
46 (also see documentation at [http:// www.lodyc.jussieu.fr/opa/](http://www.lodyc.jussieu.fr/opa/)). This model has a  
47 horizontal resolution of 2 ° both in latitude and longitude with a refinement to 0.5 ° in  
48 the meridional direction near the equator, and has 31 levels in the vertical. The  
49 vertical grid spacing increases smoothly from 10 m at the surface to about 50 m near  
50 500 m, about 70 m near 1000 m depth, and about 400 m at 6000 m.

51  
52 The model uses a free surface formulation (Roulet and Madec, 2000). Vertical eddy  
53 viscosity and diffusivity coefficients are computed from a 1.5 turbulent closure  
54 scheme (Blanke and Delecluse, 1993) allowing an explicit formulation of the mixed  
55 layer as well as a minimum diffusion in the thermocline. Horizontal viscosity is of  
56 Laplacian type and lateral diffusivity is “quasi-pure” isopycnal as described in  
57 Guilyardi et al. (2001). There is no interactive sea-ice model in this configuration:  
58 sea-ice cover is relaxed towards observed monthly climatology.

59  
60 This OGCM has been extensively validated in uncoupled mode in the tropics where it  
61 closely matches the observations (Vialard et al., 2001; Lengaigne et al., 2003). In  
62 particular, the model succeeds in reproducing the basin wide structures of currents  
63 and sea level and temperature, and accurately simulates the Kelvin waves (Lengaigne  
64 et al., 2002), of particular importance for the current study. This model is also widely  
65 used in coupled mode for process studies (Guilyardi et al., 2001; Guilyardi et al., 2003;  
66 Inness et al., 2003), paleoclimate simulations (Braconnot et al., 1999) and climate

67 change experiments (Friedlingstein et al., 2001).

68

69 The HadAM3 atmospheric model has different horizontal resolutions in latitude and  
70 longitude. The resolution of  $2.5^\circ$  by  $3.75^\circ$  can best meet the requirements of the  
71 simulations. The 19 vertical levels, corresponding to a layer thickness of about 100  
72 hPa in the mid-troposphere, are evenly spacing in the lower levels but are smaller near  
73 the boundary layer and around the tropopause. Convection is parameterized using the  
74 mass-flux scheme of Gregory and Rowntree (1990), with the addition of convective  
75 momentum transport (Gregory et al., 1997). A more detailed description of this model  
76 and its performance in atmospheric model intercomparison project (AMIP)-type  
77 integrations can be found in Pope et al. (2000) and references therein. The HadAM3  
78 has also been performed and tested by Inness et al. (2001) to simulate aspects of  
79 tropical intraseasonal activity, in well agreement with the observations.

80

81 The ocean is coupled with the atmospheres via the air-sea fluxes and SST exchange  
82 through OASIS 2.4 (Valke et al., 2000). Air-sea fluxes and SST are exchanged every  
83 day.

84

85 It is worth noting that the SPSH advances southwesterly with an intensifying in  
86 austral summer and retreats northeasterly with a weakening in austral winter in  
87 seasonal cycle. However, the SPSH shifts southwestward with a weakening during El  
88 Nino periods and migrates northeastward with an intensifying during La Nina,

89 suggesting that the intensity of the SPSH play a negligible role (the seasonal  
90 intensifying of the SPSH offsets the El Nino-related weakening of the SPSH in austral  
91 summer).

92

93 In order to account for the low-frequency modulation of the wind stress curls (WSC)  
94 by the meridional position of the SPSH, a simplified scheme of coupled WSC-SPSH  
95 relationship is applied (He et al., 2004). The intensity of the ECC is linearly related to  
96 the reversed Walker Circulation which is determined by the veered NE Trade Winds  
97 and the MJO-related westerly winds. The meridional position of the ECC, however, is  
98 automatically calculated based on the relationship between the ECC and the wind  
99 stress curls and the SPSH obtained by running this model with persistent appropriate  
100 background forcings (Shchepetkin and McWilliams, 2005) (**Extended Data Fig.5**).

101 The relationship of a coupled SST-WSC is also employed (Lian et al., 2014). The  
102 initial longitude of the westerly winds is set to  $150^{\circ}\text{E}$  (the area in west of the  $150^{\circ}\text{E}$  is  
103 largely influenced by the regional circulations), with a magnitude of  $0.08\text{ Nm}^{-2}$ . In  
104 contrast to Lengaigne et al. (2006) who used strong westerly winds to simulate El  
105 Ninos, only weak westerly winds are needed to produce strong SST anomalies in  
106 Nino3 region after applying the relationship of a coupled ECC-SPSH to this study.

107 The initial triggering of the MJO-related westerly winds is purely random, but it is  
108 allowed to actually occur only when the meridional position anomalies of the ECC  
109 exceed  $+3^{\circ}$ . For simplicity, the veered NE Trade Winds are considered same with the  
110 MJO-related westerly winds. The mean meridional position of the ECC is set to  $5^{\circ}\text{N}$

111 in winter and 8°N in summer (climatological mean). The mean min/max meridional  
112 position of the SPSH is set to 16°S/35°S and the mean min/max zonal position of  
113 the SPSH is set to 105°W/80°W (climatological mean). The mean position of the Peru  
114 Current is set to be linearly related to the meridional position of the SPSH. The SPSH  
115 moves northerly or southerly (constrained latitudes 10°S-48°S) at a speed of 0.17° per  
116 day, which is representative of the observed shifting speed. Once above conditions are  
117 met, The meridional position and intensity of the ECC, westerly winds, NE/SE Trade  
118 Winds, upwelling feedbacks, SSTs anomalies, etc., will follow the variations of the  
119 SPSH. The surface mixed layer of the model is fixed to 50 m, and the mixed-layer  
120 heat budget, including all components of anomalous advection and a linear damping,  
121 is a standard output of the model. This simulation covers the evolution over a  
122 two-year period. We define that a southward shift of the SPSH is weak as  $\Delta\phi_{\text{spsH}}$  is  
123 less than 7° with a speed of 0.15° per day or less while a southward shift of the SPSH  
124 is strong as  $\Delta\phi_{\text{spsH}}$  is great than 9° with a speed of 0.3° per day or more.

125

126 The SST data used in this study is the Hadley Centre Global Sea Ice and Sea Surface  
127 Temperature (HadISST) version 1.1 from 1961 to 2010 with a resolution of 1° by 1°  
128 (<http://www.metoffice.gov.uk/hadobs/hadisst/data/download.html>). The daily surface  
129 wind speed is from the National Centres for Environmental Prediction (NCEP)  
130 reanalysis from 1961 to 2010 with a resolution of 2.5° by 2.5°  
131 (<http://www.esrl.noaa.gov/psd/data/gridded/data.ncep.reanalysis.surface.html>). The  
132 warm-water volume, which is defined as the integral of water above the 20°C

133 isotherm over the equatorial Pacific (120°E to 80°W, 5°S to 5°N) (Meinen and  
 134 McPhaden, 2000), is derived from the potential temperature and salinity datasets from  
 135 the NCEP Global Ocean Data Assimilation System (GODAS) reanalysis from 1980 to  
 136 2014 (<http://www.esrl.noaa.gov/psd/data/gridded/data.godas.html>).

137

138 Although the simulated zonal wind stress and ECC position anomalies are relatively  
 139 in agreement with the observations (**Fig 5. & Extended Data Figs 5-6**), the model  
 140 overestimates the maximum SST anomalies by about 10% due to a relatively  
 141 simplified structure.

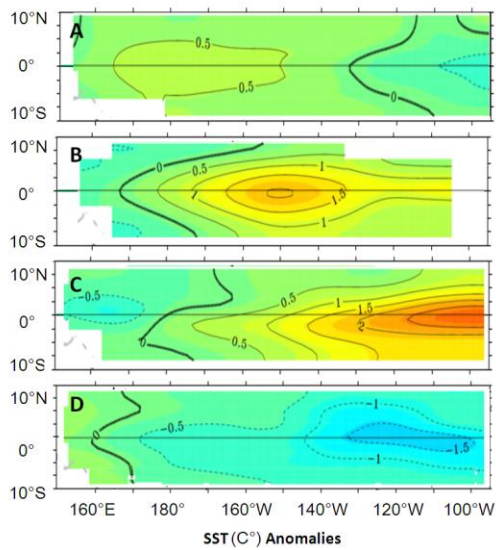

142

143 **Extended Data Fig 3. Simulated El Niños and La Niña.** **A**, a CP-El Niño (weak) near the dateline as  
 144 the  $\Delta\phi_{\text{spsh}}$  is  $\sim +7^\circ$  of latitude (a southward anomaly is positive). **B**, a canonical El Niño between central  
 145 and the eastern tropical Pacific as the  $\Delta\phi_{\text{spsh}}$  is  $\sim +8^\circ$  of latitude. **C**, an EP-El Niño in the eastern tropical  
 146 Pacific as the  $\Delta\phi_{\text{spsh}}$  is  $\sim +9^\circ$  of latitude. **D**, a weak La Niña near the eastern tropical Pacific as the  $\Delta\phi_{\text{spsh}}$   
 147 is  $\sim -2^\circ$  of latitude with zonal position anomalies ( $\Delta\lambda_{\text{spsh}}$ )  $\sim +5^\circ$  of longitude (an eastward anomaly is  
 148 positive).

149

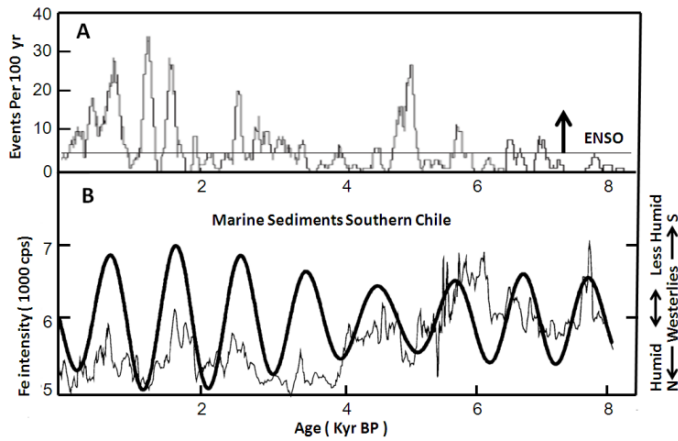

150

151 **Extended Data Fig 4. Comparison between changes in ENSO variability and the variations of the**  
 152 **iron concentrations which are thought to reflect the position shifts of the Westerlies off southern**  
 153 **Chile during the Holocene. A, Previously published time series and wavelet power spectrum**  
 154 **documenting the number of ENSO events in 100-yr overlapping windows during the Holocene (Moy et**  
 155 **al., 2002). B, Previously published iron content of marine sediments off southern Chile is interpreted as**  
 156 **a proxy for rainfall and the position of the Southern Westerlies (thinner line=five-point moving average)**  
 157 **(Varma et al., 2011).**

158

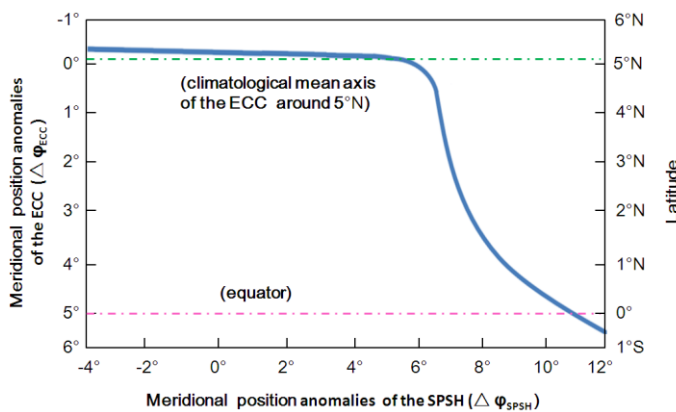

159

160 **Extended Data Fig 5. The response of the meridional position anomalies of the ECC to the**  
 161 **meridional position anomalies of the SPSH. A southward position anomaly is positive. The dashed**  
 162 **green line and pink line represent the climatological mean axis position of the ECC and the equator**  
 163 **position, respectively.**

164



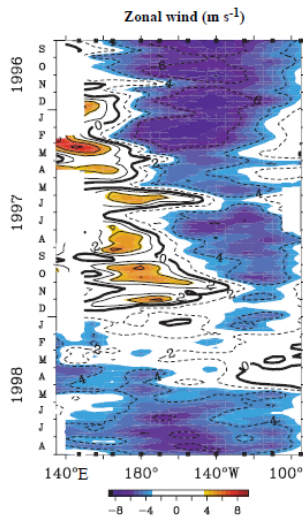

165  
166  
167  
168  
169  
170  
171

**Extended Data Fig 6. Surface zonal wind from September 1996 to August 1998.** Analyses are based on 5-day averages for between 2°N and 2°S for the TAO data. Positive winds are westerly, negative winds are easterly (McPhaden, 1999).

172 **Supplementary references and notes**

173

174 Blanke B, Delecluse P. Variability of the tropical Atlantic ocean simulated by a  
175 general circulation model with two different mixed layer physics. *J Phys*  
176 *Oceanogr* **23**, 1363-1388(1993).

177 Braconnot P, Joussaume S, Marti O, de Noblet N. Synergistic feedback from ocean  
178 and vegetation of the African monsoon response to mid-Holocene insolation.  
179 *Geophys Res Lett* 26, 2481–2484 (1999).

180 Friedlingstein P, Bopp L, Ciais P, Dufresne J-L, Fairhead L, LeTreut H, Monfray P,  
181 Orr J. Positive feedback between future climate change and the carbon cycle.  
182 *Geophys Res Lett* 28, 1543-1546(2001).

183 Gregory D, Rowntree PR. A mass flux convection scheme with the representation of  
184 cloud ensemble characteristics and stability dependent closure. *Mon Wea Rev* 118,  
185 1483-1506 (1990).

186 Gregory D, Kershaw R, Inness PM. Parametrisation of momentum transport by  
187 convection II: tests in single column and general circulation models. *Q J R Meteor*  
188 *Soc* 123, 1153-1183(1997).

189 Guilyardi E, Delecluse P, Gualdi S, Navarra A. Mechanisms for ENSO phase change  
190 in a coupled GCM. *J Climate* 16, 1141-1158 (2003).

191 Guilyardi E, Madec G, Terray L. The role of lateral ocean physics in the upper ocean  
192 thermal balance of a coupled oceanatmosphere GCM. *Clim Dyn* 13,  
193 149-165(2001).

194 He, R., Liu, Y.& Weisberg, R. H Coastal ocean wind fields gauged against the  
195 performance of an ocean circulation model. *Geophys Res Lett* 31(14),  
196 189-207(2004).

197 Inness P, Slingo JM, Guilyardi E, Cole J. Simulation of the Madden-Julian oscillation  
198 in a coupled general circulation model II: the role of the basic state. *J Climate* 16,  
199 365-382 (2003).

200 Inness PM, Slingo JM, Woolnough SJ, Neale RB, Pope VD. Organization of tropical  
201 convection in a GCM with varying vertical resolution: implications for the  
202 simulation of the Madden-Julian oscillation. *Clim Dyn* 17, 777-793 (2001).

203 Lengaigne M, Madec G, Menkes C, Alory G. The impact of isopycnal mixing on the  
204 tropical ocean circulation. *J Geophys Res* 108, 3345. DOI  
205 10.1029/2002JC001704(2003b).

206 Lengaigne M, Boulanger J-P, Menkes C, Masson S, Madec G, Delecluse P. Ocean  
207 response to the march 1997 westerly wind event. *J Geophys Res* 107, DOI  
208 1029/2001JC000841(2002).

209 Lian, T., Chen, D., Tang, Y. & Wu, Q. Effects of westerly wind bursts on El Nino: A  
210 new perspective. *Geophys Res Lett* 41, 3522–3527 (2014).

211 Madec G, Delecluse P, Imbard M, Le'vy C. OPA 8.1 Ocean general circulation model  
212 reference manual. Note du Po^ le de mode' lisation, Institut Pierre-Simon Laplace.  
213 No. 11, pp 91(1998).

214 Meinen, C. S. & McPhaden, M. J. Observations of warm water volume changes in the  
215 equatorial Pacific and their relationship to El Nino and La Nina., *J. Clim* 13,  
216 3551–3559 (2000).

217 Pope VD, Gallani ML, Rowntree PR, Stratton RA. The impact of new physical  
218 parametrisations in the Hadley Centre climate model-HadAM3. *Climate Dyn* 16,

219 123-146(2000).

220 Roullet G, Madec G. Salt conservation, free surface and varying volume: a new  
221 formulation for Ocean GCMs. *J Geophys Res* 105, 23927-23942(2000).

222 Shchepetkin, A. F. & McWilliams, J. C. The regional oceanic modeling system  
223 (ROMS): a split-explicit, free-surface, topography-following-coordinate oceanic  
224 model. *Ocean Modelling* 9(4), 347-404 (2005).

225 UK Hydrographic Office. Routeing Chart 5127, Taunton, UK (2012).

226 Valke S, Terray L, Piacentini A. The OASIS coupled user guide version 2.4,  
227 Technical Report TR/ CMGC/00-10, CERFACS (2000).

228 Vialard J, Menkes C, Boulanger J-P, Delecluse P, Guilyardi E, McPhadenet MJ,  
229 Madec G. Oceanic mechanisms driving the SST during the 1997-1998 El Nino. *J*  
230 *Phys Oceanogr* 31, 1649-1675(2001).

231 <http://www.esrl.noaa.gov/psd/data/gridded/data.ncep.reanalysis.surface.html>

232 <http://www.esrl.noaa.gov/psd/data/gridded/data.godas.html>

233 <http://www.metoffice.gov.uk/hadobs/hadisst/data/download.html>
